# Supplementary material
Source: PubMed Central journal article supplement (PMC5358496)
Supplement: jciinsight-2-88271-s001.pdf [file jciinsight-2-88271-s001.pdf]

A

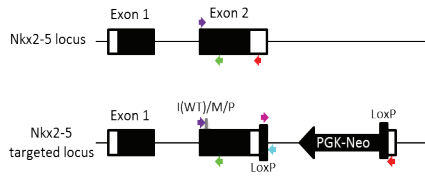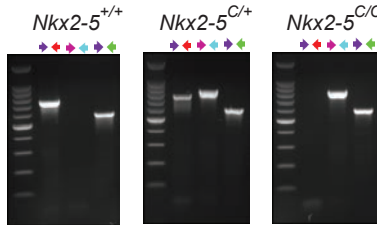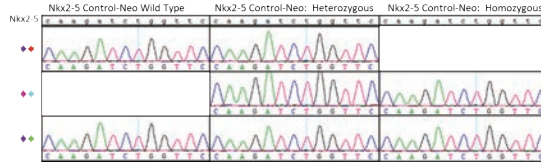

◆◆ Primer pair for WT allele  
 ◆◆ Primer pair for 'knocked-in' allele  
 ◆◆ Primer pair for both alleles

B

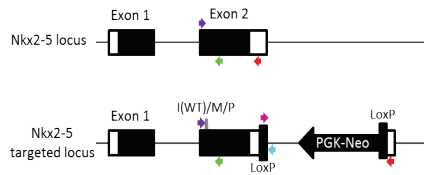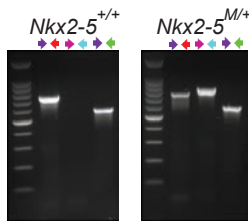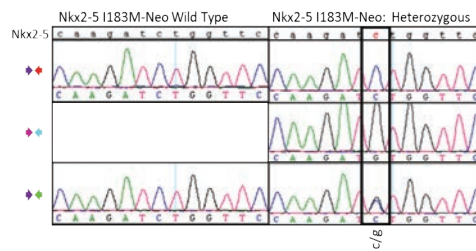

◆◆ Primer pair for WT allele  
 ◆◆ Primer pair for 'knocked-in' allele  
 ◆◆ Primer pair for both alleles

C

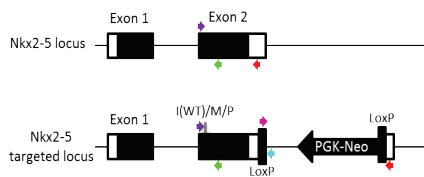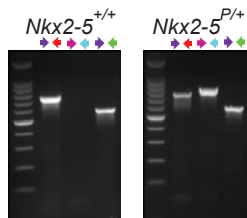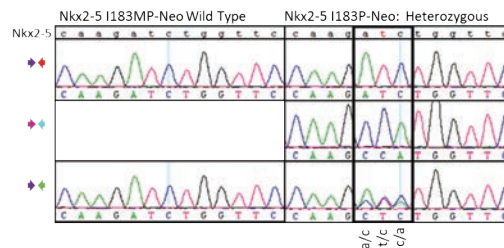

◆◆ Primer pair for WT allele  
 ◆◆ Primer pair for 'knocked-in' allele  
 ◆◆ Primer pair for both alleles

Supplementary Figure 1. Genotyping strategy to confirm mutated genes by PCR and sequencing.

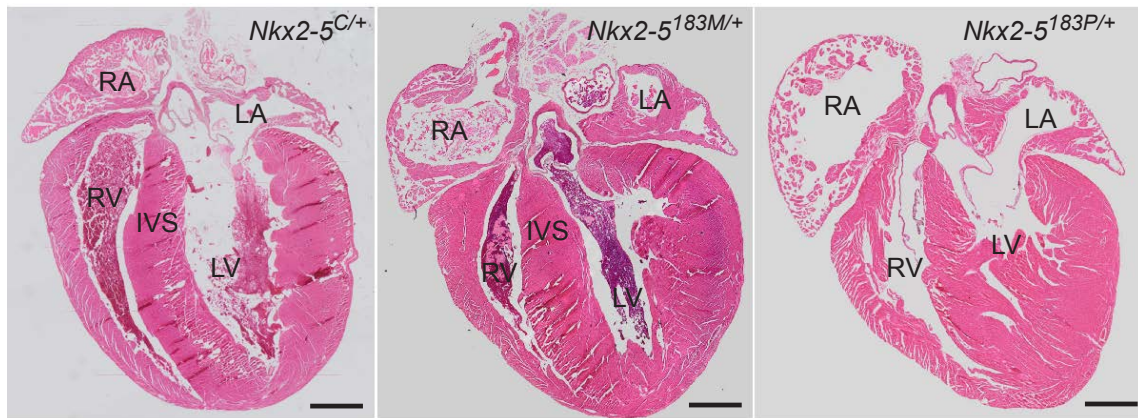

**Supplementary Figure 2. Transverse sections of 15-week hearts from heterozygous *Nkx2-5* mice.** Images show increased trabeculation, RA dilation and dysmorphic RV in mutant hearts. N=5.

A

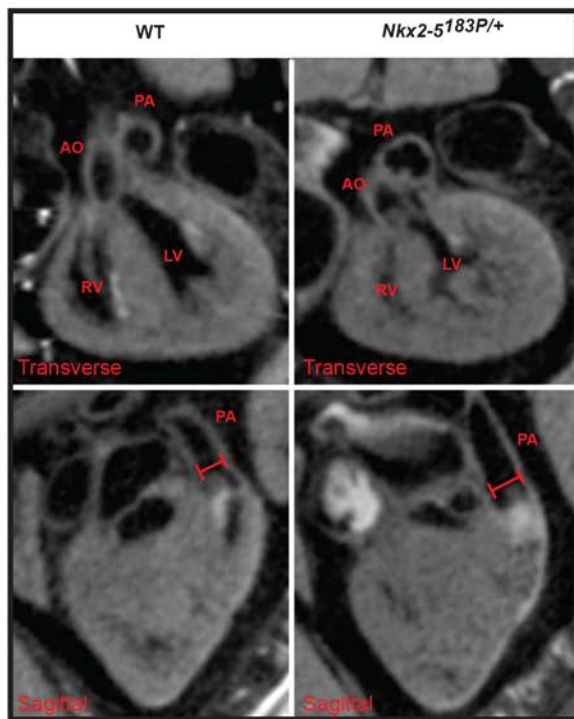

B

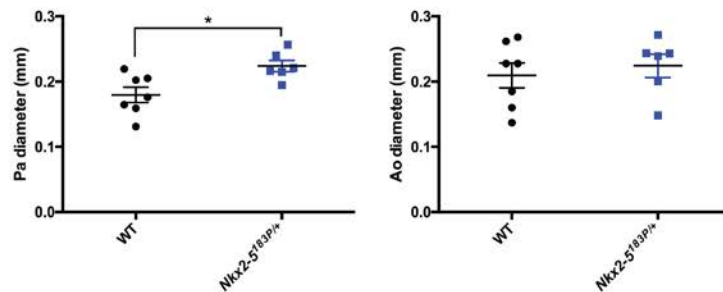

**Supplementary Figure 3. MicroCT analysis of 18.5 dpc hearts.** (A) Primary enlargement of pulmonary artery (PA) in *Nkx2-5<sup>183P/+</sup>* embryos. No changes were observed in the aorta. (B) Quantifications performed of sagittal plan using ImageJ (n=6). \*\*P<0.01, Student's t-test. Pa, pulmonary artery; Ao, aorta; LV, left ventricle; RV, right ventricle.

*Nkx2-5<sup>C/+</sup>*

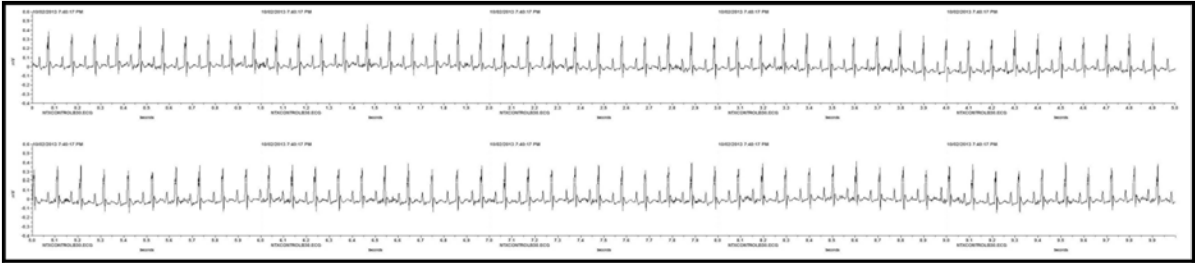

*Nkx2-5<sup>183M/+</sup>*

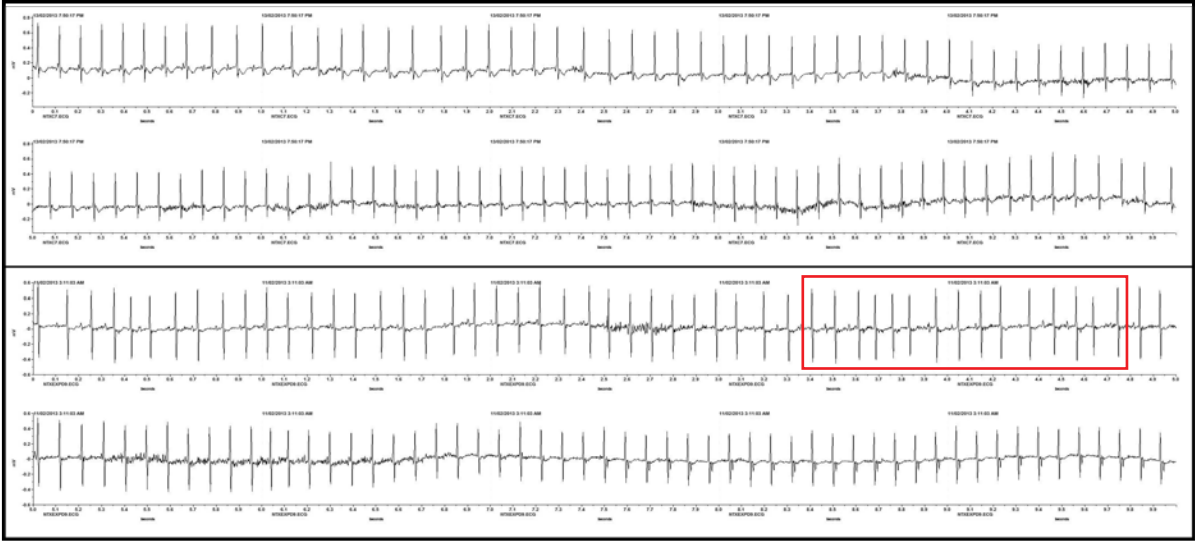

*Nkx2-5<sup>183P/+</sup>*

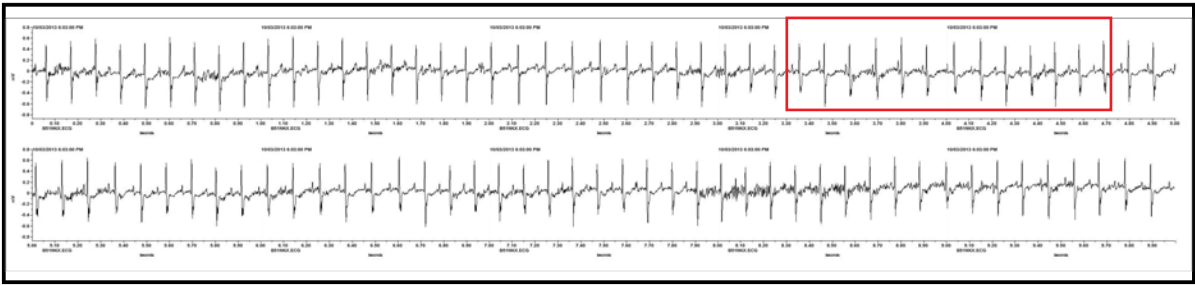

**Supplementary Figure 4. Representative ECG traces obtained from telemetry of adult *Nkx2-5* lines showing presence of arrhythmic episodes in mutant hearts (highlighted regions).**

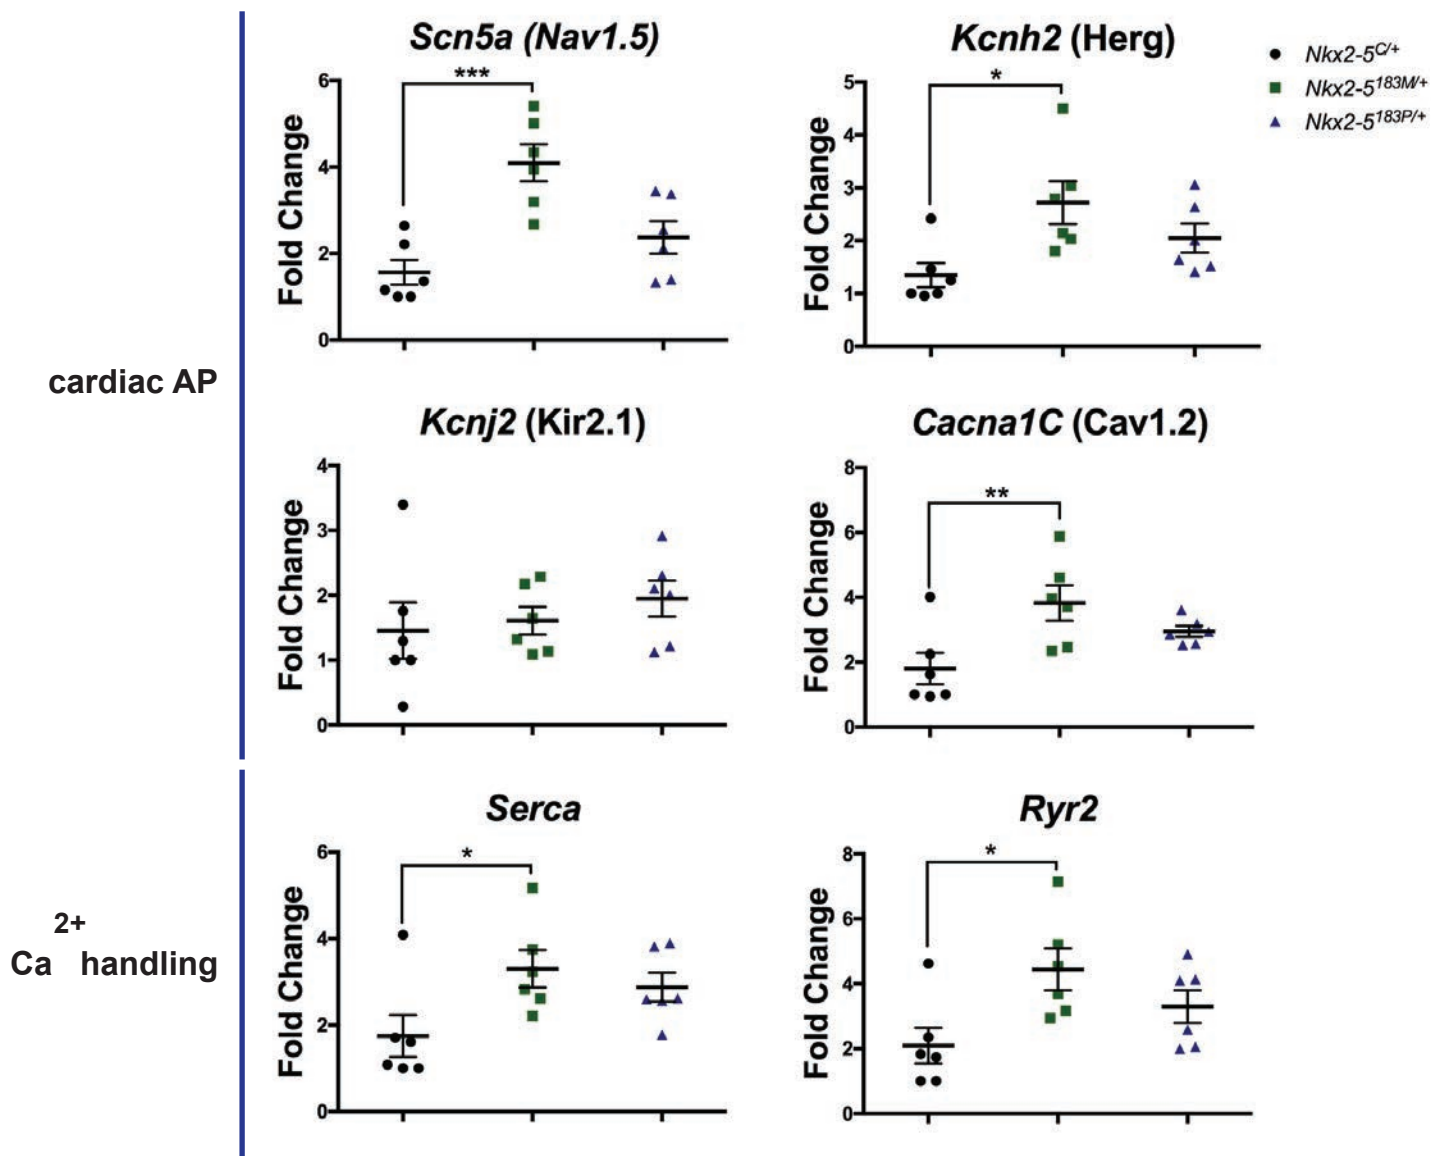

Supplementary Figure 5. qPCR analysis of ion channels, Ca<sup>2+</sup> handling and sarcomere transcripts in adult heart. N=3, \*P<0.05; \*\*P<0.01; \*\*\*P<0.001, One-Way ANOVA.

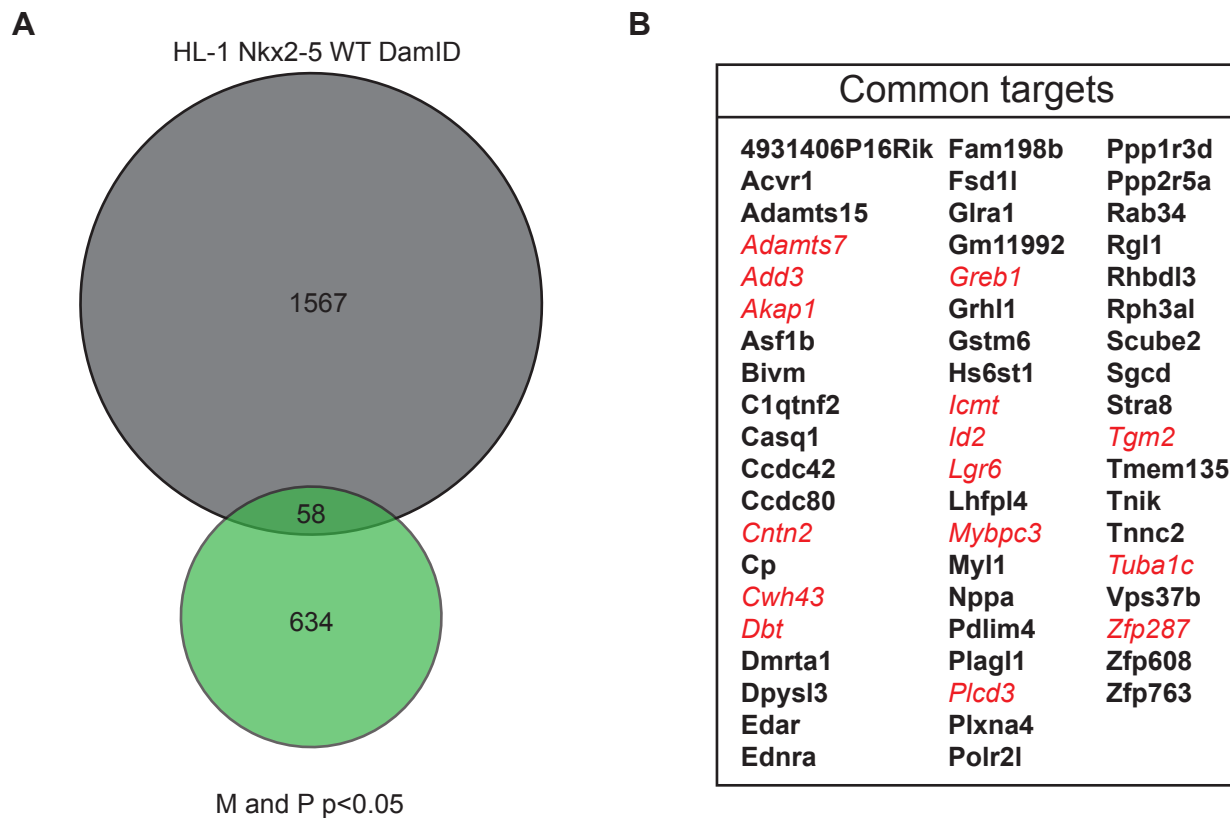

**Supplementary Figure 6. Limited overlap of direct targets detected by DamID and transcriptional changes observed in adult microarray experiments.** (A) Common and unique gene distributions are shown in Venn diagram. (B) Direct targets changed in heterozygous *Nkx2-5* mutants shown in bold. Novel putative "off target" genes (or co-regulated by *Nkx2-5* and other co-factors) shown in red italic.

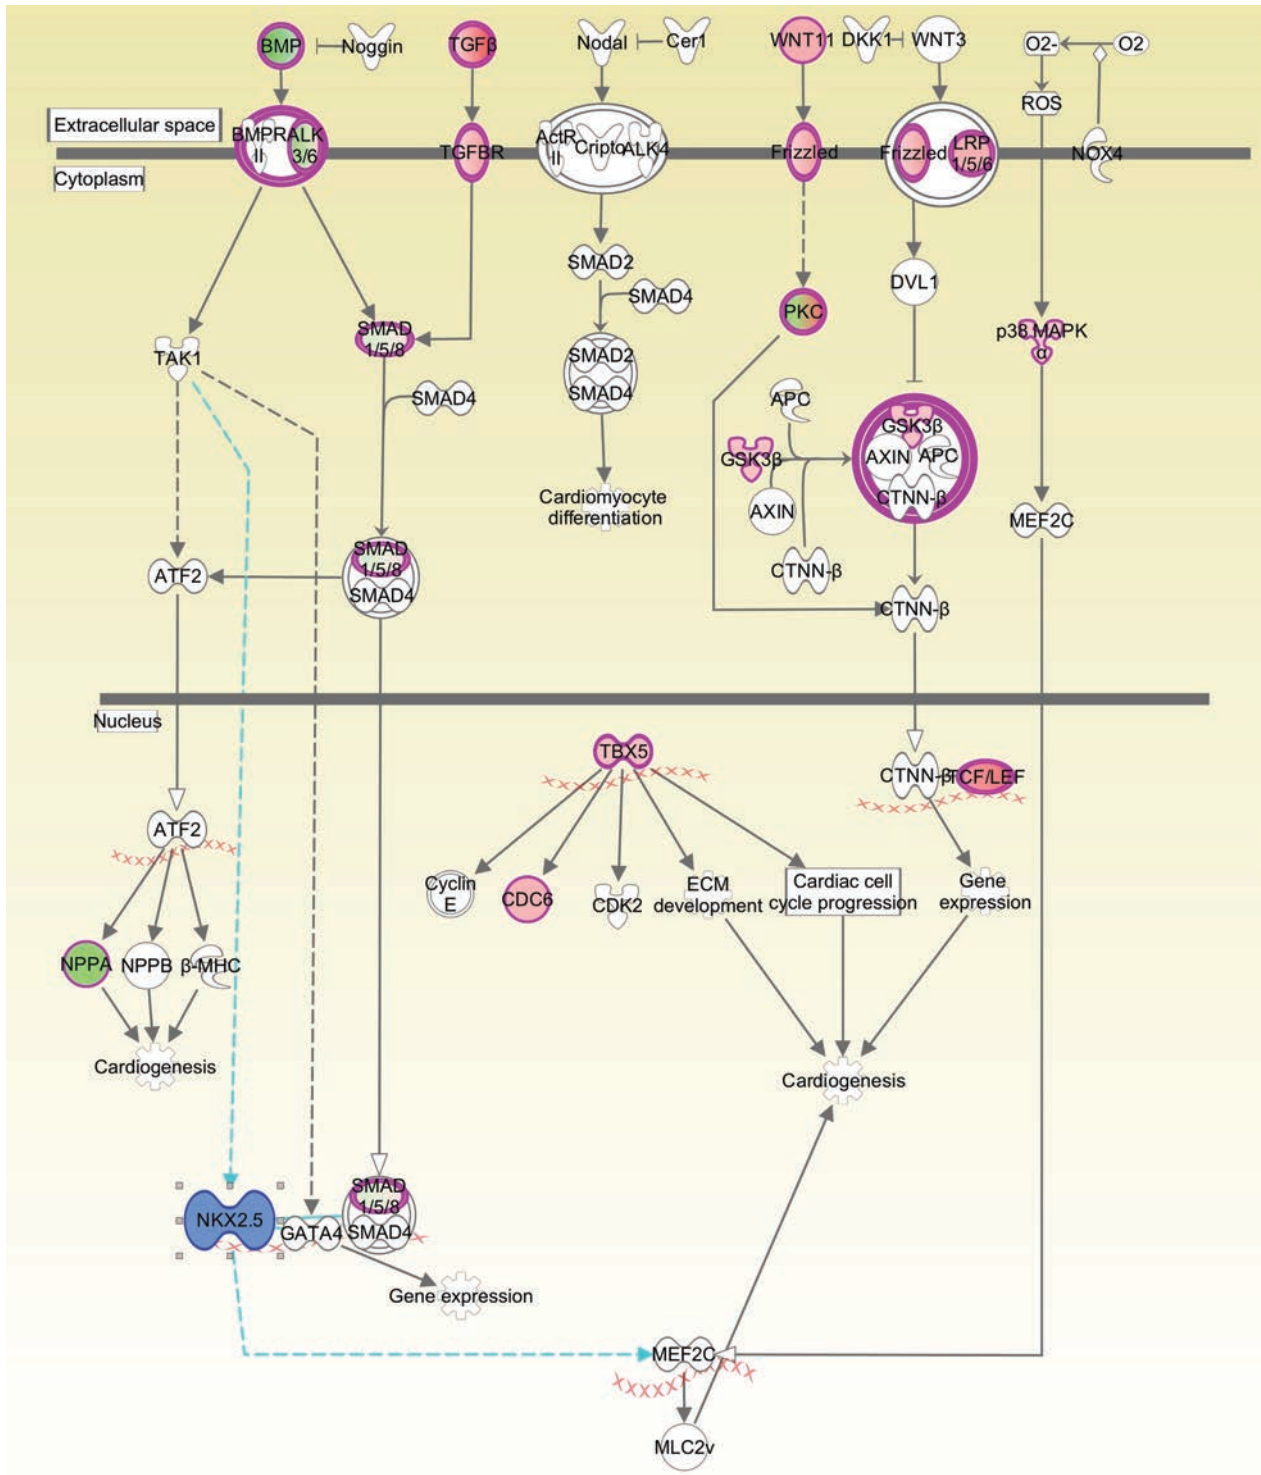

**Supplementary Figure 7. Cardiogenic pathways identified in *Nkx2-5* mutant hearts.** IPA analysis (Qiagen) identified significant changes in several genes associated with BMP, TGFbeta and Wnt signalling pathways.

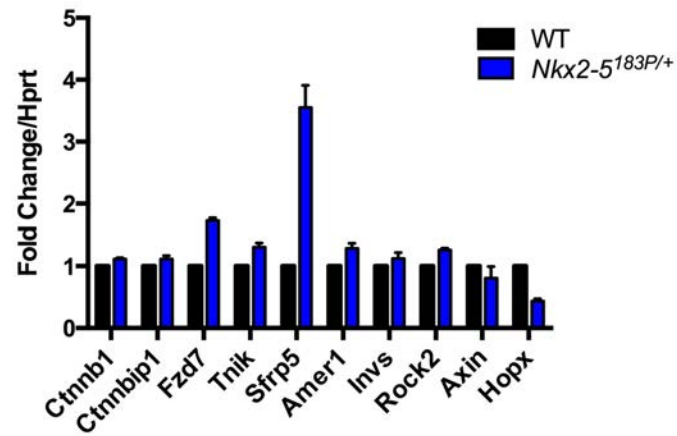

**Supplementary Figure 8. qPCR validation of Wnt associated genes in neonatal cardiomyocytes show activation of several of key regulatory genes. N=3.**



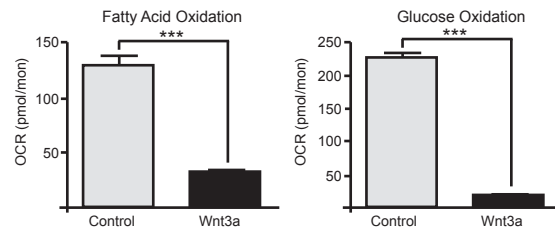

**Supplementary Figure 9. Wnt3a impairs mitochondrial metabolism in *Nkx2-5*<sup>183P/+</sup> neonatal cardiomyocytes. n=3; \*\*\*P<0.001, Student's t-test.**

|             | $\tau D_{\text{slow}}$ (ms) | $\alpha_{\text{slow}}$ | $\tau/4_{\text{slow}}$ ( $\mu\text{m}^2\text{s}^{-1}$ ) | $\tau D_{\text{free}}$ ( $\mu\text{s}$ ) | $D_{\text{free}}$ ( $\mu\text{m}^2\text{s}^{-1}$ ) | %free          | n  |
|-------------|-----------------------------|------------------------|---------------------------------------------------------|------------------------------------------|----------------------------------------------------|----------------|----|
| NKX2-5 WT   | 108±9.98                    | 0.913±0.025            | 0.460±0.086                                             | 272.2±6.32                               | 30.08±0.68                                         | 66.3±0.58      | 15 |
| NKX2-5 183M | 65.21±6.71****              | 0.826±0.027****        | 1.064±0.216****                                         | 267.3±5.89*                              | 30.61±0.73*                                        | 69.98±0.78**** | 20 |
| NKX2-5 183P | 34.03±3.06****              | 0.841±0.017****        | 1.501±0.257****                                         | 242.0±6.34****                           | 33.82±0.92****                                     | 67.56±0.56**** | 16 |
| paGFP       | -                           | -                      | -                                                       | 190.9±9.11****                           | 43.67±2.01****                                     | 95.79±0.59**** | 14 |

**Supplementary Table 1. Summary of diffusion parameters for transfected proteins in the paFCS experiment.** Data shown as mean  $\pm$  standard error of n measurements.  $\tau D_{\text{slow}}$  – dwell time of the slow-diffusing component;  $\alpha_{\text{slow}}$  – anomalous parameter of the slow-diffusing component;  $\tau/4_{\text{slow}}$  – transport coefficient for anomalous diffusion of the slow-diffusing component;  $\tau D_{\text{free}}$  – dwell time of the free-diffusing component;  $D_{\text{free}}$  – diffusion coefficient of the free-diffusing component; %free – percentage of the free-diffusing component. \*P<0.05; \*\*\*\*P<0.0001. Student's t-test when compared to NKX2-5 WT.

| <b>Control</b>                |           |               |
|-------------------------------|-----------|---------------|
|                               | <b>WT</b> | <b>C/+</b>    |
|                               | 35        | 37            |
| Chi <sup>2</sup> P Value=0.81 |           |               |
| <b>183M</b>                   |           |               |
|                               | <b>WT</b> | <b>183M/+</b> |
|                               | 158       | 141           |
| Chi <sup>2</sup> P Value=0.33 |           |               |
| <b>183P</b>                   |           |               |
|                               | <b>WT</b> | <b>183P/+</b> |
|                               | 73        | 60            |
| Chi <sup>2</sup> P Value=0.26 |           |               |

**Supplementary Table 2. Heterozygous *Nkx2-5* mice are viable and do not display increased lethality compared to control mice.** A non-significant shift in the proportion of born heterozygous mutants was detected indicative of possible decrease viability. Chi test shows expected mendelian ratios of mice generated from heterozygous *Nkx2-5* with WT crosses.

|                                       | LV-EF (%)     | LV-ESV (μl)      | LV-EDV (μl)    | LV-SV (μl)      | LV-mass (mg)  | RV-EF (%)        | RV-ESV (μl)   | RV-EDV (μl)  | RV-SV (μl)    | n  |
|---------------------------------------|---------------|------------------|----------------|-----------------|---------------|------------------|---------------|--------------|---------------|----|
| <b><i>Nkx2-5</i><sup>C/+</sup></b>    | 74.57+/-1.22  | 18.33+/-1.73     | 74.29+/-3.69   | 54.50+/-2.57    | 87.43+/-3.75  | 64.21+/-1.08     | 17.07+/-1.60  | 44.36+/-3.58 | 27.21+/-2.13  | 14 |
| <b><i>Nkx2-5</i><sup>183M/+</sup></b> | 69.15+/-1.97* | 17.30+/-1.61**** | 55.50+/-3.72** | 38.30+/-2.65*** | 73.40+/-2.54* | 46.40+/-3.24**** | 21.00+/-2.45  | 38.70+/-3.47 | 17.80+/-1.87* | 10 |
| <b><i>Nkx2-5</i><sup>183P/+</sup></b> | 72.38+/-2.03  | 20.25+/-2.03**** | 72.88+/-5.08   | 52.5+/-3.80     | 89.50+/-4.57  | 49.38+/-2.29**** | 24.50+/-1.55* | 48.88+/-3.80 | 24.50+/-2.72  | 8  |

**Supplementary Table 3. Functional analysis of adult heterozygous *Nkx2-5* mice at 15 weeks of age. \*P<0.05; \*\*P<0.01; \*\*\*P<0.001; \*\*\*\*P<0.0001. One-Way ANOVA.**

Supplementary Table 4. Differentially regulated genes between heterozygous mutant and control in 15 week adult hearts. P<0.001. Non-coding genes were excluded.

| <i>Nkx2-5<sup>183M/+</sup> x Nkx2-5<sup>C/+</sup></i> |               |        | <i>Nkx2-5<sup>183P/+</sup> x Nkx2-5<sup>C/+</sup></i> |               |        | <i>Nkx2-5<sup>delta/+</sup> x Nkx2-5<sup>C/+</sup></i> |               |       |
|-------------------------------------------------------|---------------|--------|-------------------------------------------------------|---------------|--------|--------------------------------------------------------|---------------|-------|
| Probe ID                                              | Genes         | LogFC  | Probe ID                                              | Genes         | LogFC  | Probe ID                                               | Genes         | LogFC |
| A_51_P416858                                          | Myl1          | 2.136  | A_52_P566605                                          | Hsd17b7       | 2.043  | A_55_P2004551                                          | Klra1         | 2.694 |
| A_55_P2002893                                         | Pfkfb1        | 1.572  | A_55_P2007964                                         | Cx3cr1        | 1.954  | A_55_P1960738                                          | Gm4470        | 2.430 |
| A_55_P1997936                                         | Hsd17b7       | 1.514  | A_66_P125389                                          | F830016B08Rik | 1.890  | A_55_P2370250                                          | Syn3          | 2.182 |
| A_55_P1987645                                         | Unc13b        | 1.106  | A_55_P2002893                                         | Pfkfb1        | 1.880  | A_55_P2180854                                          | Mrgprg        | 2.061 |
| A_51_P520650                                          | Dlgap1        | 1.093  | A_51_P416858                                          | Myl1          | 1.829  | A_55_P1983418                                          | Amy1          | 1.962 |
| A_55_P2108248                                         | Art4          | 0.978  | A_55_P2031781                                         | Col22a1       | 1.826  | A_66_P111689                                           | Gm9372        | 1.940 |
| A_66_P118699                                          | Rorb          | 0.882  | A_55_P2166049                                         | Vmn1r65       | 1.806  | A_55_P1996314                                          | Amy2a5        | 1.901 |
| A_55_P1991770                                         | Pdlim4        | 0.872  | A_55_P1983418                                         | Amy1          | 1.738  | A_55_P2109922                                          | Gm2921        | 1.893 |
| A_55_P1988699                                         | Cacna2d1      | 0.858  | A_55_P2133195                                         | Gm4951        | 1.631  | A_55_P1959430                                          | Chat          | 1.890 |
| A_55_P2134004                                         | Gstm2         | 0.793  | A_55_P2050390                                         | Cdh22         | 1.609  | A_65_P20683                                            | Km1070        | 1.867 |
| A_55_P1953400                                         | Rbfox1        | 0.622  | A_51_P229655                                          | Acsm5         | 1.504  | A_55_P2173857                                          | Orly          | 1.797 |
| A_55_P1958758                                         | Olf965        | -0.513 | A_55_P2006494                                         | Apol10b       | 1.459  | A_51_P326229                                           | Ddx25         | 1.785 |
| A_51_P212038                                          | Atp6v0e2      | -0.527 | A_52_P53019                                           | Rhd13         | 1.453  | A_55_P2006950                                          | Usp8          | 1.746 |
| A_55_P2015753                                         | Enho          | -0.540 | A_66_P112495                                          | Scn4b         | 1.403  | A_66_P133993                                           | Gm5093        | 1.731 |
| A_55_P1980556                                         | Gm4316        | -0.626 | A_51_P268069                                          | Six1          | 1.402  | A_55_P2133195                                          | Gm4951        | 1.676 |
| A_66_P108685                                          | Cideb         | -0.662 | A_51_P382369                                          | Zfp608        | 1.379  | A_51_P416858                                           | Myl1          | 1.568 |
| A_55_P2041966                                         | Dnajc5b       | -0.678 | A_55_P1997936                                         | Hsd17b7       | 1.327  | A_55_P2144248                                          | Zfp790        | 1.520 |
| A_52_P233515                                          | Tll13         | -0.693 | A_55_P2096144                                         | Gnao1         | 1.250  | A_55_P2004761                                          | H2-Eb2        | 1.481 |
| A_55_P2162747                                         | Accn4         | -0.722 | A_52_P434306                                          | Col22a1       | 1.191  | A_55_P2007964                                          | Cx3cr1        | 1.478 |
| A_55_P1955009                                         | C130079G13Rik | -0.742 | A_52_P308507                                          | Chd6          | 1.184  | A_55_P2019004                                          | Ncoa7         | 1.435 |
| A_55_P1991209                                         | Lair1         | -0.763 | A_52_P111031                                          | Pcdh17        | 1.129  | A_51_P516728                                           | Hap1          | 1.392 |
| A_55_P2020449                                         | Vmn1r31       | -0.875 | A_55_P1996314                                         | Amy2a5        | 1.093  | A_55_P2006494                                          | Apol10b       | 1.314 |
| A_55_P2123057                                         | Olf853        | -0.878 | A_55_P1956418                                         | Efr3b         | 1.080  | A_52_P518922                                           | Itga1         | 1.294 |
| A_55_P2119764                                         | Krtap6-1      | -0.889 | A_51_P520650                                          | Dlgap1        | 1.073  | A_55_P2177910                                          | Lepr          | 1.265 |
| A_55_P2232988                                         | Scube2        | -0.905 | A_55_P2014427                                         | Il17re        | 1.069  | A_55_P2018017                                          | Tnfsf10       | 1.199 |
| A_55_P2130256                                         | Polr2l        | -0.909 | A_55_P1991770                                         | Pdlim4        | 1.058  | A_55_P2039622                                          | Clec4a2       | 1.195 |
| A_51_P116932                                          | Lad1          | -0.911 | A_55_P1991214                                         | Lair1         | 1.036  | A_55_P2106394                                          | D2Ertd750e    | 1.165 |
| A_55_P2089422                                         | Olig3         | -0.966 | A_55_P2018017                                         | Tnfsf10       | 1.006  | A_55_P1979818                                          | Srp54b        | 1.162 |
| A_55_P2017929                                         | Clu           | -0.976 | A_51_P346641                                          | Armcx4        | 1.003  | A_55_P1995141                                          | Cas21         | 1.152 |
| A_52_P603038                                          | Olig1         | -0.978 | A_52_P340073                                          | Efnb2         | 0.995  | A_66_P139387                                           | Prlr          | 1.143 |
| A_52_P599573                                          | 4930596D02Rik | -1.030 | A_52_P599789                                          | Qrich2        | 0.937  | A_51_P458852                                           | Ina           | 1.133 |
| A_66_P102910                                          | Rcvrn         | -1.032 | A_55_P2108248                                         | Art4          | 0.915  | A_55_P1986566                                          | Gm19668       | 1.110 |
| A_51_P434758                                          | Fam83e        | -1.053 | A_51_P234788                                          | Cx3c5         | 0.906  | A_52_P434306                                           | Col22a1       | 1.098 |
| A_52_P329414                                          | Calm5         | -1.097 | A_55_P2143025                                         | Sema3c        | 0.900  | A_55_P2120596                                          | BC018473      | 1.094 |
| A_55_P2041286                                         | Gm3970        | -1.100 | A_55_P2228122                                         | BC024137      | 0.896  | A_55_P2043833                                          | Srgap2        | 1.073 |
| A_55_P2019483                                         | Ndr4          | -1.243 | A_55_P1968370                                         | Gprc5c        | 0.894  | A_52_P308507                                           | Chd6          | 1.034 |
| A_52_P222026                                          | Chnb2         | -1.275 | A_65_P11092                                           | Tspan15       | 0.883  | A_66_P112495                                           | Scn4b         | 1.018 |
| A_52_P156775                                          | Scgb1c1       | -3.829 | A_55_P2137611                                         | Irgm2         | 0.875  | A_55_P2148688                                          | Nipal3        | 0.992 |
|                                                       |               |        | A_66_P118699                                          | Rorb          | 0.841  | A_65_P10913                                            | Tgfb2         | 0.950 |
|                                                       |               |        | A_52_P596592                                          | Rassf9        | 0.812  | A_55_P2076524                                          | 1700028I16Rik | 0.944 |
|                                                       |               |        | A_51_P169516                                          | Ppp1r3d       | 0.769  | A_55_P1956418                                          | Efr3b         | 0.942 |
|                                                       |               |        | A_55_P1953400                                         | Rbfox1        | 0.722  | A_66_P118699                                           | Rorb          | 0.933 |
|                                                       |               |        | A_55_P2060343                                         | Zfp352        | 0.702  | A_55_P2049553                                          | Gm6003        | 0.925 |
|                                                       |               |        | A_55_P2134004                                         | Gstm2         | 0.696  | A_55_P2161342                                          | Pkib          | 0.922 |
|                                                       |               |        | A_51_P483473                                          | St3gal5       | 0.657  | A_55_P2422243                                          | 2900072G11Rik | 0.897 |
|                                                       |               |        | A_51_P284486                                          | Gstm2         | 0.629  | A_52_P340073                                           | Efnb2         | 0.890 |
|                                                       |               |        | A_55_P2096043                                         | Acot11        | 0.574  | A_55_P1966438                                          | Gstm2         | 0.885 |
|                                                       |               |        | A_51_P458866                                          | F11r          | 0.562  | A_55_P2173353                                          | Gm628         | 0.875 |
|                                                       |               |        | A_52_P552665                                          | Fzd7          | 0.523  | A_51_P284486                                           | Gstm2         | 0.850 |
|                                                       |               |        | A_55_P1963712                                         | Cyb5b         | 0.519  | A_55_P2120993                                          | Zfp282        | 0.842 |
|                                                       |               |        | A_55_P1980556                                         | Gm4316        | -0.473 | A_55_P2335648                                          | D630045M09Rik | 0.827 |
|                                                       |               |        | A_51_P306047                                          | Sec13         | -0.555 | A_55_P2134581                                          | Papola        | 0.804 |
|                                                       |               |        | A_55_P2147280                                         | Myh1          | -0.591 | A_55_P2009427                                          | Nrsn2         | 0.802 |
|                                                       |               |        | A_52_P322941                                          | Gm11992       | -0.628 | A_55_P2057321                                          | Myh7b         | 0.797 |
|                                                       |               |        | A_55_P2023001                                         | Slc47a1       | -0.657 | A_55_P2005941                                          | Plcx1         | 0.796 |
|                                                       |               |        | A_55_P2110935                                         | 2310046A06Rik | -0.666 | A_52_P596592                                           | Rassf9        | 0.786 |
|                                                       |               |        | A_55_P1959510                                         | Oog3          | -0.668 | A_55_P2134004                                          | Gstm2         | 0.768 |
|                                                       |               |        | A_55_P1973868                                         | Sema3b        | -0.700 | A_51_P485260                                           | Rgl1          | 0.748 |
|                                                       |               |        | A_51_P108489                                          | Gtl3          | -0.734 | A_55_P1997614                                          | Gm9693        | 0.731 |
|                                                       |               |        | A_51_P403049                                          | Heat5b        | -0.767 | A_55_P2131379                                          | Ybx1          | 0.727 |
|                                                       |               |        | A_66_P106661                                          | Slc7a1        | -0.804 | A_55_P2016851                                          | Lce1a2        | 0.724 |
|                                                       |               |        | A_66_P114543                                          | Jmjd6         | -0.821 | A_55_P2088331                                          | Ctdsp2        | 0.717 |
|                                                       |               |        | A_55_P1970126                                         | Heat5b        | -0.824 | A_55_P2072656                                          | Ckmt1         | 0.708 |
|                                                       |               |        | A_55_P2315366                                         | D630022N01Rik | -0.836 | A_55_P2156785                                          | Ppfia3        | 0.701 |
|                                                       |               |        | A_51_P116932                                          | Lad1          | -0.873 | A_51_P505493                                           | Elovl5        | 0.677 |
|                                                       |               |        | A_52_P112110                                          | Tmem82        | -0.908 | A_55_P1992049                                          | Gucy1a3       | 0.623 |
|                                                       |               |        | A_52_P368306                                          | Tmem100       | -0.944 | A_55_P2009576                                          | Rnu12         | 0.617 |
|                                                       |               |        | A_52_P319438                                          | Ankrd37       | -0.988 | A_55_P2096535                                          | Icmt          | 0.615 |
|                                                       |               |        | A_55_P2109877                                         | Gm4718        | -1.019 | A_55_P2164998                                          | LOC546711     | 0.590 |
|                                                       |               |        | A_55_P2041286                                         | Gm3970        | -1.052 | A_55_P1956179                                          | Git2          | 0.579 |
|                                                       |               |        | A_51_P253984                                          | Pcp4          | -1.210 | A_55_P1955244                                          | LOC677113     | 0.572 |
|                                                       |               |        | A_51_P434758                                          | Fam83e        | -1.232 | A_55_P1979705                                          | Spop          | 0.568 |
|                                                       |               |        | A_51_P254425                                          | Ahrr          | -1.306 | A_55_P2068451                                          | Gm7634        | 0.565 |
|                                                       |               |        | A_55_P2019483                                         | Ndr4          | -1.634 | A_65_P09177                                            | Strn3         | 0.530 |
|                                                       |               |        | A_51_P308844                                          | Nrn1          | -1.795 | A_55_P2106351                                          | Pde8a         | 0.526 |

|              |         |        |               |               |        |
|--------------|---------|--------|---------------|---------------|--------|
| A_66_P108685 | Cideb   | -1.832 | A_55_P2161829 | Hmgb1-rs17    | 0.509  |
| A_51_P386899 | Mfsd7c  | -1.977 | A_55_P2049256 | Mapkapk5      | -0.513 |
| A_52_P156775 | Scgb1c1 | -3.764 | A_51_P306047  | Sec13         | -0.528 |
|              |         |        | A_55_P2186558 | 5730437N04Rik | -0.549 |
|              |         |        | A_51_P259902  | Arl6ip5       | -0.559 |
|              |         |        | A_55_P2093949 | Zfp428        | -0.595 |
|              |         |        | A_66_P111666  | Nprl3         | -0.614 |
|              |         |        | A_55_P2089820 | Adk           | -0.615 |
|              |         |        | A_51_P427828  | 2310046A06Rik | -0.639 |
|              |         |        | A_55_P2140288 | Phka2         | -0.659 |
|              |         |        | A_55_P2041966 | Dnajc5b       | -0.664 |
|              |         |        | A_55_P1973868 | Sema3b        | -0.665 |
|              |         |        | A_55_P2064243 | Rhot2         | -0.678 |
|              |         |        | A_55_P2047305 | Adcy5         | -0.685 |
|              |         |        | A_55_P2160686 | Tsc22d1       | -0.714 |
|              |         |        | A_55_P1970126 | Heatr5b       | -0.721 |
|              |         |        | A_55_P2087647 | Grhpr         | -0.726 |
|              |         |        | A_51_P173285  | Nkx2-5        | -0.729 |
|              |         |        | A_55_P2058947 | Gpr113        | -0.737 |
|              |         |        | A_55_P2059323 | Gm13315       | -0.759 |
|              |         |        | A_51_P139030  | Slc38a3       | -0.786 |
|              |         |        | A_55_P2028942 | Ncam1         | -0.789 |
|              |         |        | A_55_P2141878 | Ldha          | -0.801 |
|              |         |        | A_51_P416137  | Slc31a2       | -0.801 |
|              |         |        | A_52_P444785  | N4bp2l2       | -0.813 |
|              |         |        | A_52_P319438  | Ankrd37       | -0.822 |
|              |         |        | A_55_P2017929 | Clu           | -0.828 |
|              |         |        | A_55_P1977926 | Itgam         | -0.829 |
|              |         |        | A_51_P207892  | Pla2g5        | -0.834 |
|              |         |        | A_55_P1991475 | Sesn1         | -0.835 |
|              |         |        | A_66_P106661  | Slc7a1        | -0.848 |
|              |         |        | A_55_P2029517 | Wnk2          | -0.863 |
|              |         |        | A_55_P2415372 | Mta1          | -0.890 |
|              |         |        | A_55_P2198648 | 5830420C07Rik | -0.925 |
|              |         |        | A_55_P2152962 | Mtr           | -0.954 |
|              |         |        | A_55_P2001048 | Rom1          | -0.958 |
|              |         |        | A_51_P308844  | Nrn1          | -0.990 |
|              |         |        | A_51_P264527  | Fam69b        | -1.043 |
|              |         |        | A_51_P366672  | Slc36a2       | -1.050 |
|              |         |        | A_51_P403049  | Heatr5b       | -1.083 |
|              |         |        | A_51_P441687  | Lrrc10        | -1.099 |
|              |         |        | A_52_P322941  | Gm11992       | -1.139 |
|              |         |        | A_55_P2243828 | LOC552901     | -1.185 |
|              |         |        | A_51_P116932  | Lad1          | -1.197 |
|              |         |        | A_66_P108685  | Cideb         | -1.198 |
|              |         |        | A_55_P2221647 | Al605517      | -1.238 |
|              |         |        | A_52_P112110  | Tmem82        | -1.261 |
|              |         |        | A_51_P253984  | Pcp4          | -1.379 |
|              |         |        | A_51_P386899  | Mfsd7c        | -1.617 |
|              |         |        | A_51_P102257  | Tns1          | -1.624 |
|              |         |        | A_55_P2091005 | Emilin3       | -1.726 |
|              |         |        | A_55_P2019483 | Ndrgr4        | -1.765 |
|              |         |        | A_51_P416059  | Dirc2         | -3.131 |
|              |         |        | A_52_P156775  | Scgb1c1       | -3.339 |
|              |         |        | A_55_P2042778 | Pde5a         | -3.912 |

**Supplementary Table 5: Nuclear mitochondrial genes altered in Nkx2-5 mutant hearts , p<0.05**

Unique genes in the dataset are highlighted.

| <i>Nkx2-5<sup>C/+</sup> vs Nkx2-5<sup>183M/+</sup></i> |            |            |
|--------------------------------------------------------|------------|------------|
| Gene                                                   | LogFC      | P          |
| 1110001A16Rik                                          | -0.2735286 | 0.03047379 |
| Abat                                                   | -0.666291  | 0.04384559 |
| Acadl                                                  | 0.30546113 | 0.03183362 |
| Acsm2                                                  | -0.545393  | 0.02471223 |
| Acsm5                                                  | 1.29224592 | 0.00154268 |
| Agxt2                                                  | -0.6908551 | 0.01612945 |
| Akap1                                                  | -0.5103126 | 0.04614019 |
| Amt                                                    | -0.6748733 | 0.00285085 |
| Casp8                                                  | 0.76276356 | 0.02175548 |
| Cbr3                                                   | 0.72490057 | 0.03283243 |
| Cdc25c                                                 | -0.5441091 | 0.03934748 |
| Chdh                                                   | 0.42025026 | 0.03729079 |
| Cox4i2                                                 | 0.53064339 | 0.02645452 |
| Cps1                                                   | -0.5487251 | 0.00546736 |
| Dbt                                                    | 0.48975997 | 0.02276071 |
| Fasn                                                   | -0.8122031 | 0.0287357  |
| Gcat                                                   | 0.333234   | 0.04556823 |
| Gcdh                                                   | 0.31986668 | 0.04989917 |
| Hadha                                                  | 0.33235942 | 0.02684848 |
| Hmgcs2                                                 | 1.65147922 | 0.01235979 |
| Ivd                                                    | 0.31014115 | 0.02372705 |
| Maob                                                   | 0.45267599 | 0.01746585 |
| Me2                                                    | 0.41942569 | 0.04354536 |
| Me3                                                    | -0.474724  | 0.02861808 |
| Nags                                                   | 0.91847019 | 0.04157501 |
| Ndufab1                                                | 0.63786613 | 0.01936018 |
| Nme6                                                   | -0.6824001 | 0.0414029  |
| Ppm1k                                                  | 0.509431   | 0.01581422 |
| Ppm1m                                                  | -0.6462861 | 0.0220071  |
| Prodh2                                                 | -0.595124  | 0.00823404 |
| Ptrh2                                                  | 0.43433368 | 0.0457698  |
| Rmnd1                                                  | 0.34720346 | 0.00925468 |
| Rps15a                                                 | -0.4576475 | 0.03456073 |
| Slc25a29                                               | 0.76007537 | 0.02892512 |
| Timm22                                                 | -0.6810465 | 0.03081372 |
| Trmt1                                                  | -0.8409265 | 0.03605288 |
| Trmt1                                                  | -1.2295023 | 0.02465549 |
| Tst                                                    | 0.37721316 | 0.02695517 |

| <i>Nkx2-5<sup>C/+</sup> vs Nkx2-5<sup>183P/+</sup></i> |            |            |
|--------------------------------------------------------|------------|------------|
| Gene                                                   | LogFC      | P          |
| 1110001A16Rik                                          | -0.3684221 | 0.00624785 |
| Abcb7                                                  | 0.91775109 | 0.04919295 |
| Acox3                                                  | 0.43592058 | 0.04566804 |
| Acs16                                                  | -0.7315617 | 0.039003   |
| Acsm5                                                  | 1.50401067 | 0.00047378 |
| Adeck2                                                 | 0.31050142 | 0.04922751 |
| Agxt2                                                  | 0.50324262 | 0.0359715  |
| Akap1                                                  | -0.619753  | 0.01921539 |
| Aldh1b1                                                | 0.52841921 | 0.03472067 |
| Amt                                                    | -0.5074039 | 0.01596197 |
| Arl2                                                   | -0.3680006 | 0.01445108 |
| Bad                                                    | -0.5935721 | 0.02454758 |
| Bak1                                                   | 0.291371   | 0.02696098 |
| Bcat1                                                  | -0.734577  | 0.03348201 |
| Bdh1                                                   | -0.8739484 | 0.01357747 |
| Bdh1                                                   | -1.0106383 | 0.00319729 |
| Bdh1                                                   | -1.0802411 | 0.00209509 |
| Cbr3                                                   | 0.68455371 | 0.04193345 |
| Chchd7                                                 | -0.2985351 | 0.04369802 |
| Clpp                                                   | -0.2971245 | 0.02727664 |
| Coq10a                                                 | -0.243407  | 0.03453831 |
| Cox10                                                  | -1.2687552 | 0.00976674 |
| Cox4i2                                                 | 0.57062091 | 0.01858243 |
| Cps1                                                   | -0.4221114 | 0.0233802  |
| Cpt1a                                                  | 0.46017903 | 0.01784874 |
| Cyb5b                                                  | 0.51932933 | 0.00086999 |
| Cyb5r2                                                 | -0.9789595 | 0.04460805 |
| Cycs                                                   | 0.90661363 | 0.04133428 |
| Dbt                                                    | 0.65499598 | 0.0044012  |
| Dmpk                                                   | 0.25711383 | 0.04679421 |
| Dnajc19                                                | 0.45284948 | 0.04996707 |
| Ehhadh                                                 | 1.09748815 | 0.00982639 |
| Fasn                                                   | -1.1116536 | 0.00521318 |
| Fdx11                                                  | -0.3002078 | 0.03123492 |
| Fhit                                                   | -1.3132776 | 0.03443687 |
| Fis1                                                   | -0.6122372 | 0.04754122 |
| Fxn                                                    | -0.3078358 | 0.02543058 |
| Glrx2                                                  | 0.6607267  | 0.00996206 |
| Gm2382                                                 | 0.55726484 | 0.03866337 |
| Grhpr                                                  | -0.6572423 | 0.00150302 |

|          |            |            |
|----------|------------|------------|
| Grpel2   | -0.6036483 | 0.01068428 |
| Guk1     | -0.2825575 | 0.03369678 |
| Hmgcs2   | 1.70759453 | 0.01025461 |
| Hscb     | -0.327761  | 0.02845506 |
| Idh1     | 0.96962212 | 0.00238931 |
| Ivd      | 0.34382811 | 0.01406349 |
| Kmo      | 0.76216892 | 0.01264214 |
| Letm1    | -0.4711852 | 0.0114351  |
| Maob     | 0.54301714 | 0.00625622 |
| Mccc1    | 0.46395968 | 0.02345801 |
| Me1      | 0.36044501 | 0.01239332 |
| Me1      | 0.35266655 | 0.01995034 |
| Me2      | 0.6410993  | 0.00475765 |
| Nars2    | 0.9629256  | 0.03229298 |
| Ndufa11  | -0.3311165 | 0.01490096 |
| Neu4     | -1.0561795 | 0.04995186 |
| Obscn    | -0.4408223 | 0.0045021  |
| Pdp2     | 0.80287553 | 0.00503707 |
| Phb2     | -0.4212033 | 0.03497485 |
| Ppif     | -0.4731227 | 0.00807968 |
| Ppm1m    | 0.5112551  | 0.040396   |
| Pptc7    | 1.08357813 | 0.03087387 |
| Prdx6    | -0.3656082 | 0.03964185 |
| Ptcd1    | -1.113848  | 0.03245393 |
| Pthr2    | 0.59968795 | 0.00952199 |
| Rab32    | 0.6130598  | 0.0479702  |
| Rhot2    | -0.4179646 | 0.01453174 |
| Rmnd1    | 0.31438739 | 0.01598274 |
| Sfxn1    | 0.58947106 | 0.01339047 |
| Sfxn2    | 0.90694058 | 0.03452953 |
| Sfxn5    | 1.21129972 | 0.0358932  |
| Sfxn5    | -1.381183  | 0.03627511 |
| Slc25a22 | 0.75229823 | 0.00241471 |
| Slc25a29 | 0.75346365 | 0.03009611 |
| Slc25a42 | 0.3473958  | 0.04078559 |
| Timm10   | -0.3698313 | 0.0391626  |
| Timm50   | -0.4911362 | 0.01037723 |
| Tomm40   | -0.4879227 | 0.00273034 |
| Tpi1     | -0.3418447 | 0.01506538 |
| Trmt1    | -1.0016886 | 0.01565189 |
| Tst      | 0.34673418 | 0.03913891 |
| Tstd1    | 0.65750023 | 0.03182337 |
| Txn2     | 0.68971734 | 0.03448759 |
| Ucp3     | 0.92425566 | 0.00589386 |



| <i>Nkx2-5<sup>C/+</sup></i> vs <i>Nkx2-5<sup>I83P/+</sup></i> |         |         |
|---------------------------------------------------------------|---------|---------|
| Genes                                                         | Log FC  | P-Value |
| <i>Smad1</i>                                                  | -0.3721 | 0.0333  |
| <i>Smad5</i>                                                  | 0.2589  | 0.0459  |
| <i>Smad6</i>                                                  | 0.8491  | 0.0375  |
| <i>Bmp5</i>                                                   | -1.5434 | 0.0445  |
| <i>Bmp7</i>                                                   | -0.8044 | 0.0020  |
| <i>Bmp10</i>                                                  | -0.8628 | 0.0350  |
| <i>Hopx</i>                                                   | 0.4720  | 0.0332  |

**Supplementary Table 6. Differential expression of Tgfb/Bmp associated genes in *Nkx2-5<sup>I83P/+</sup>* mice.**

**Supplementary Table 7. Primers and antibodies used.**

| Gene                                                       | primer name              | sequence 5'-3'                                    | PCR fragm | ID             |
|------------------------------------------------------------|--------------------------|---------------------------------------------------|-----------|----------------|
| <b>qPCR</b>                                                |                          |                                                   |           |                |
| Hypoxanthine phosphorybosyl transferase                    | Hprt1 F<br>Hprt1 R       | GCGAGGGAGAGCGTTGGGCT<br>CATCATCGCTAATCACGACGCTGGG | 146 bp    | NM_013556.2    |
| NK2 transcription factor related, locus 5                  | Nkx2-5 F<br>Nkx2-5 R     | TCAAGCCCGAGGCCTACTCTGG<br>TGGTCTCTCGGCGCCATCCG    | 248 bp    | NM_008700.2    |
| Secretoglobin, family 1C, member 1                         | Scgb1c1 F<br>Scgb1c1 R   | CTGCGTCTGTGGGCTGACTA<br>CGTAGAGTTCTTCCGGGGTC      | 95 bp     | NM_001099742.1 |
| N-myc downstream regulated gene 4                          | Ndr4 F<br>Ndr4 R         | TTCGGCAAATCCCCTTCCTC<br>CCGGATCACCACATGCAGAA      | 95 bp     | NM_001195006.1 |
| Jumonji domain containing 6                                | Jmjd6 F<br>Jmjd6 R       | GCACAAGACGGTAAGAGGGAG<br>CTCAGGGTGCTCCTGTTTCA     | 73 bp     | NM_033398.2    |
| Sine oculis-related homeobox 1                             | Six1 F<br>Six1 R         | AGAACCGGAGGCAAAGAGAC<br>CCCCTTCCAGAGGAGAGAGT      | 108 bp    | NM_009189.3    |
| Calcium channel, voltage-dependent, alpha2/delta subunit 1 | Cacna2d1 F<br>Cacna2d1 R | GTCATGGGTGGACAAGATGC<br>ATTTCAACCAGTTGGCGTGC      | 141 bp    | NM_001110843.1 |
| Myosin, light polypeptide 1                                | Myl1 F<br>Myl1 R         | TTGGGAACCCAGCAATGAA<br>ACGCAGACCCTCAACGAAAT       | 128 bp    | NM_021285.3    |
| Signal peptide, CUB domain, EGF-like 2                     | Scube2 F<br>Scube2 R     | TGTGACAACACACTCAACGGA<br>TGTTCTCCAAGCATTCGTCCA    | 139 bp    | NM_020052.2    |
| Signal peptide, CUB domain, EGF-like 3                     | Scube3 F<br>Scube3 R     | CTGCTACGACGGATTTACCT<br>AGCTGCCCATCATGTTGACACA    | 113 bp    | NM_001004366.1 |
| Catenin (cadherin associated protein), beta 1              | Ctnnb1 F<br>Ctnnb1 R     | GAGCACATCAGGACACCCAA<br>CCGAGCAAGGATGTGGAGAG      | 122 bp    | NM_007614.3    |
| Catenin beta interacting protein 1                         | Ctnnbip1 F<br>Ctnnbip1 R | CACAGCACTCCATCGACCAG<br>CGGTCTTCCGTCTCCGATCT      | 70 bp     | NM_023465.4    |
| Frizzled homolog 7                                         | Fzd7 F<br>Fzd7 R         | ACCCTACTGCTCCCTACCTG<br>AGAAGGGGAAAGACAAGCGG      | 84 bp     | NM_008057.3    |
| TRAF2 and NCK interacting kinase                           | Tnik F<br>Tnik R         | CCCATGAGCCTTCCAAGGTG<br>GCTAATGCCGTCAGATCCTCA     | 106 bp    | NM_026910.1    |
| Secreted frizzled-related sequence protein 5               | Sfrp5 F<br>Sfrp5 R       | CTGGACAACGACCTCTGCAT<br>GCTGTGCTCCATCTCACACT      | 99 bp     | NM_018780.3    |
| APC membrane recruitment 1                                 | Amer1 F                  | GCAGCGCAGCAGACAATAAA                              | 102 bp    | NM_175179.4    |

|                                                              |                                      |                                                                     |                         |             |
|--------------------------------------------------------------|--------------------------------------|---------------------------------------------------------------------|-------------------------|-------------|
| Inversin                                                     | Amer1 R<br>Invs F<br>Invs R          | CTTTGGATTCCGGGCACACT<br>AGCAGCGCCTGCTGATAAT<br>CAAATGCAGAAGCCGAGACA | 137 bp                  | NM_010569.4 |
| Rho-associated coiled-coil containing protein kinase 2       | Rock2 F<br>Rock2 R                   | CTCATCCGAGACCCTCGCTC<br>CAAGGACCAAGGAATTTAAGC                       | 70 bp                   | NM_009072.2 |
| Axin2                                                        | Axin2 F<br>Axin2 R                   | ATAAGCAGCCGTTCCGCGATG<br>GCAATCGGCTTGGTCTCTCT                       | 135 bp                  | NM_015732.4 |
| HOP homeobox                                                 | Hopx F<br>Hopx R                     | AGGTGGAGATCCTGGAGTACA<br>AGGCGCTGCTTAAACCATT                        | 127 bp                  | NM_175606.3 |
| Sodium channel, voltage-gated, type V, alpha                 | Nav1.5 F<br>Nav1.5 R                 | GATGAGGAGAACAGCCTTGG<br>CACAACCTTGGGATTCCTGCT                       | 66 bp                   | NM_021544.3 |
| Potassium voltage-gated channel, subfamily H, member 2       | Kenh2 F<br>Kenh2 R                   | GATCGCCTTCTACCGGAAA<br>CATTCTTCACGGGTACCACA                         | 68 bp                   | NM_013569.2 |
| Calcium channel, voltage-dependent, L type, alpha 1C subunit | Cav1.2 F<br>Cav1.2 R                 | CATGAAGCTCAACTCAACTGTTTC<br>CGTGGGCTCCCATAGTTG                      | 62 bp                   | NM_009781.3 |
| Sarcoplasmic reticulum Ca ATPase                             | Serca F<br>Serca R                   | TCGACCAGTCAATTCTTACAGG<br>CAGGGACAGGGTCAGTATGC                      | 63 bp                   | NM_009722.3 |
| Ryanodine receptor 2 (cardiac)                               | Ryr2 F<br>Ryr2 R                     | TTCAACACGCTCACGGAGTA<br>TGCCAGGCTCTGCTGATT                          | 60 bp                   | NM_023868.2 |
| <b>Genotyping</b>                                            |                                      |                                                                     |                         |             |
|                                                              | Nkx2-5 CO WT For<br>Nkx2-5 CO WT Rev | CGTGAACCTTTGGCGTCGGGG<br>ATAAATACGGGTGGGTGGG                        | 398 bp WT<br>486 bp MUT |             |
| <b>Antibodies</b>                                            |                                      |                                                                     |                         |             |
| Nkx2-5, rabbit                                               | Abcam                                | ab35842                                                             |                         |             |
| $\alpha$ -tubulin, mouse                                     | St Cruz Bio.                         | sc-5286                                                             |                         |             |
| b-catenin, mouse                                             | BD Biosciences                       | 610154                                                              |                         |             |
| anti mouse IgG-488                                           | Invitrogen                           | A11001                                                              |                         |             |
| anti rabbit IgG-568                                          | Invitrogen                           | A11011                                                              |                         |             |
| anti rabbit IgG-680                                          | Invitrogen                           | A10043                                                              |                         |             |
| anti mouse IgG-IR dye 800                                    | Li-Cor                               | 926-32214                                                           |                         |             |
